# Supplementary material for: Differences between Cerebral Organoids Derived from a non-PD and a Parkinson’s Patient: A Potential Vulnerability for Neuroinvasive Viruses
Source: Preprints.org preprint supplement (doi:10.20944/preprints202101.0480.v1), 2021-01-25
Supplement: Supplementary file 1 [file supplementary]

## Sheet: Sheet1
	Non-PD	DCt	PD	DCt	DDCt	fold change	log fold change
Gene ID	raw CT		raw CT
18S	4.02407		16.1308
GUSB	22.3493		28.835
HPRT1	21.8351		29.4015
GAPDH	16.7487		23.6956
ABAT	22.0193	0.330036	26.9145	1.9205	-1.59046	3.01146	1.59046
ACHE	25.8726	-3.52332	33.431	-4.59605	1.07273	0.475418	-1.07273
BSN	27.7707	-5.42142	32.6796	-3.84467	-1.57675	2.98296	1.57675
CHAT	31.1397	-8.79037	33.1626	-4.3276	-4.46277	22.0509	4.46277
CHRM1	30.3274	-7.97811	34.386	-5.55101	-2.4271	5.3781	2.4271
CHRM2	26.6368	-4.28745	28.7885	0.0464935	-4.33394	20.1673	4.33394
CHRM3	24.8907	-2.54137	30.7416	-1.90665	-0.634722	1.55264	0.634722
CHRM4	25.9236	-3.57431	28.544	0.290932	-3.86524	14.5731	3.86524
CHRM5	28.1947	-5.84538	33.5932	-4.75826	-1.08711	2.12448	1.08711
CHRNA2	31.187	-8.83764	33.7075	-4.8725	-3.96515	15.6181	3.96515
CHRNA3	27.3342	-4.98491	33.9947	-5.15969	0.174789	0.885897	-0.174789
CHRNA4	28.7651	-6.41583	30.0111	-1.1761	-5.23974	37.7849	5.23974
CHRNA5	27.2232	-4.8739	33.6372	-4.80218	-0.0717182	1.05097	0.0717182
CHRNA6	28.1468	-5.79745	34.5432	-5.70824	-0.0892086	1.06379	0.0892086
CHRNB2	27.4056	-5.05629	30.461	-1.62598	-3.43031	10.7802	3.43031
CHRNB3	28.456	-6.10664	34.0043	-5.16936	-0.937286	1.91492	0.937286
CHRNB4	25.6123	-3.26303	30.2927	-1.45775	-1.80528	3.49496	1.80528
CHRND	30.959	-8.60966	33.5075	-4.67253	-3.93713	15.3177	3.93713
CHRNE	28.2235	-5.87415	35.2407	-6.4057	0.531555	0.691809	-0.531555
COMT	21.6852	0.664122	30.2114	-1.37645	2.04057	0.243067	-2.04057
CPLX1	27.5471	-5.19777	32.2515	-3.41652	-1.78125	3.43723	1.78125
DRD2	25.6493	-3.29997	30.6054	-1.77038	-1.52959	2.88704	1.52959
DRD3	36.2863	-13.937	38.139	-9.30399	-4.63304	24.8133	4.63304
GABBR1	22.5262	-0.176849	25.5978	3.23718	-3.41403	10.6592	3.41403
GABRA1	29.9157	-7.56637	32.7551	-3.92014	-3.64624	12.5207	3.64624
GABRA2	33.2564	-10.9071	34.4395	-5.60454	-5.30253	39.4658	5.30253
GABRA4	33.1966	-10.8473	36.2824	-7.44738	-3.39993	10.5556	3.39993
GABRA5	28.9073	-6.55796	28.1633	0.671677	-7.22964	150.085	7.22964
GABRA6	36.7952	-14.4459	41	-12.165	-2.28083	4.85957	2.28083
GABRB1	27.8565	-5.50721	29.9762	-1.14119	-4.36601	20.6206	4.36601
GABRB2	26.0083	-3.65903	32.4423	-3.6073	-0.0517349	1.03651	0.0517349
GABRB3	24.5398	-2.19047	26.6506	2.18436	-4.37483	20.747	4.37483
GABRD	29.8674	-7.5181	35.787	-6.952	-0.566103	1.48052	0.566103
GABRE	26.8605	-4.51117	31.3478	-2.51281	-1.99836	3.99547	1.99836
GABRG1	31.4663	-9.11702	35.8507	-7.01569	-2.10133	4.29105	2.10133
GABRG2	27.7344	-5.38509	29.9251	-1.09015	-4.29494	19.6293	4.29494
GABRG3	29.8977	-7.54836	32.351	-3.516	-4.03237	16.363	4.03237
GABRP	19.7529	2.59638	34.6775	-5.84256	8.43894	0.00288156	-8.43894
GABRQ	26.148	-3.79873	28.7597	0.0753117	-3.87404	14.6623	3.87404
GABRR1	31.2485	-8.89923	34.5128	-5.67783	-3.2214	9.32691	3.2214
GABRR2	28.4869	-6.13756	34.5416	-5.70664	-0.430918	1.34809	0.430918
GAD1	26.5164	-4.16711	31.5558	-2.72087	-1.44624	2.72497	1.44624
GCH1	27.3014	-4.95211	34.512	-5.67703	0.724916	0.605032	-0.724916
GLRA1	29.3508	-7.00144	28.7394	0.0956173	-7.09706	136.908	7.09706
GLRA2	29.5773	-7.228	29.4962	-0.66124	-6.56676	94.7966	6.56676
GLRA3	31.4537	-9.10435	31.5408	-2.70584	-6.3985	84.361	6.3985
GLRB	25.4265	-3.07714	29.9338	-1.09887	-1.97827	3.94021	1.97827
GRIA1	27.155	-4.80573	26.9716	1.86338	-6.66911	101.766	6.66911
GRIK4	30.9091	-8.5598	33.6955	-4.8605	-3.6993	12.9898	3.6993
HTR1B	25.9217	-3.57241	30.9405	-2.10554	-1.46688	2.76423	1.46688
HTR1E	25.9957	-3.64635	32.2536	-3.41858	-0.22777	1.17102	0.22777
HTR2A	27.6351	-5.28583	29.4386	-0.603617	-4.68221	25.6736	4.68221
HTR3A	32.6372	-10.2879	34.3701	-5.53511	-4.7528	26.961	4.7528
HTR3B	39.9393	-17.59	41	-12.165	-5.42501	42.9626	5.42501
HTR7	28.1606	-5.81126	33.5551	-4.72009	-1.09117	2.13047	1.09117
MAOA	20.6556	1.69373	27.6794	1.15558	0.538145	0.688656	-0.538145
PHOX2A	29.9376	-7.58825	34.1956	-5.36064	-2.22762	4.6836	2.22762
RIMS1	29.683	-7.33365	34.7544	-5.91945	-1.41421	2.66513	1.41421
RIMS3	27.0627	-4.71341	32.4613	-3.62632	-1.08709	2.12445	1.08709
RIMS4	24.1711	-1.82182	27.8769	0.958092	-2.77991	6.86811	2.77991
SLC18A2	27.9183	-5.56897	35.7307	-6.89573	1.32676	0.398664	-1.32676
SLC18A3	28.9252	-6.57589	32.81	-3.97504	-2.60085	6.06643	2.60085
SLC1A3	22.7515	-0.402231	23.9759	4.85907	-5.2613	38.3538	5.2613
SLC32A1	32.8694	-10.5201	37.388	-8.55305	-1.96704	3.90964	1.96704
SLC5A7	26.8996	-4.5503	28.8118	0.0231533	-4.57345	23.8093	4.57345
SLC6A1	29.8169	-7.46762	30.8994	-2.06443	-5.40319	42.3179	5.40319
SLC6A11	25.8009	-3.45157	30.3004	-1.46545	-1.98613	3.96172	1.98613
SLC6A12	27.5465	-5.19715	35.8252	-6.99025	1.7931	0.288552	-1.7931
SLC6A13	31.4155	-9.06614	37.8356	-9.00058	-0.0655632	1.04649	0.0655632
SLC6A15	25.2562	-2.90686	32.4579	-3.62294	0.716085	0.608747	-0.716085
SLC6A16	37.0441	-14.6948	41	-12.165	-2.52977	5.77479	2.52977
SLC6A18	35.7474	-13.398	41	-12.165	-1.23302	2.35059	1.23302
SLC6A2	29.0218	-6.67247	41	-12.165	5.49255	0.0222115	-5.49255
SLC6A20	28.2393	-5.88997	32.169	-3.33407	-2.5559	5.88033	2.5559
SLC6A4	24.6881	-2.33881	41	-12.165	9.82622	0.00110157	-9.82622
SLC6A5	29.3123	-6.96295	34.5023	-5.66729	-1.29565	2.45488	1.29565
SLC6A6	24.0758	-1.72645	29.6832	-0.848272	-0.878178	1.83805	0.878178
SLC6A7	33.9424	-11.5931	32.1741	-3.33913	-8.254	305.283	8.254
SLC6A8	21.6136	0.735727	27.6532	1.18179	-0.446058	1.36231	0.446058
SLC6A9	28.0749	-5.72562	36.7269	-7.89196	2.16634	0.222776	-2.16634
SNPH	24.7449	-2.39558	41	-12.165	9.76944	0.00114579	-9.76944
STX1A	25.4757	-3.12635	37.6503	-8.81535	5.689	0.0193838	-5.689
STX1B	24.9318	-2.58247	36.2923	-7.4573	4.87484	0.0340822	-4.87484
STX3	23.1303	-0.780952	41	-12.165	11.3841	0.000374156	-11.3841
STXBP1	22.4728	-0.12351	29.6255	-0.790554	0.667044	0.629796	-0.667044
SV2A	22.8698	-0.520494	29.7223	-0.88735	0.366856	0.775471	-0.366856
SYN1	25.4164	-3.0671	29.5207	-0.685686	-2.38141	5.21046	2.38141
SYN2	24.8419	-2.49257	30.8067	-1.9717	-0.520868	1.43482	0.520868
SYN3	25.8109	-3.46163	28.8707	-0.0357189	-3.42591	10.7473	3.42591
SYP	23.3006	-0.951311	25.7573	3.07772	-4.02903	16.3252	4.02903
SYT1	24.0358	-1.68653	28.5021	0.332897	-2.01943	4.05423	2.01943
TPH1	21.969	0.380316	31.7774	-2.94239	3.32271	0.0999461	-3.32271
18S	4.41787		14.6949
GUSB	23.4984		25.9345
HPRT1	23.0067		27.4647
GAPDH	18.4102		21.6029
IL1A	26.2935	-2.79509	31.1296	-5.19509	2.39999	0.189466	-2.39999
IL1B	25.9022	-2.40375	32.3546	-6.42011	4.01637	0.061795	-4.01637
IL2	37.5206	-14.0222	41	-15.0655	1.04328	0.485222	-1.04328
IL3	Undetermined	#VALUE!	Undetermined	#VALUE!	#VALUE!	#VALUE!	#VALUE!
IL4	Undetermined	#VALUE!	Undetermined	#VALUE!	#VALUE!	#VALUE!	#VALUE!
IL5	36.9112	-13.4128	41	-15.0655	1.65272	0.318041	-1.65272
IL6	28.9234	-5.42497	32.5394	-6.60492	1.17995	0.441368	-1.17995
IL7	29.9945	-6.49605	31.6888	-5.75431	-0.741734	1.67218	0.741734
IL8	23.3243	0.174103	28.2162	-2.28171	2.45581	0.182275	-2.45581
IL9	36.5862	-13.0878	41	-15.0655	1.97771	0.253892	-1.97771
IL10	29.1269	-5.62851	32.505	-6.57048	0.941978	0.520519	-0.941978
IL12A	31.4756	-7.97716	31.9784	-6.04384	-1.93332	3.81934	1.93332
IL12B	36.2111	-12.7126	Undetermined
IL13	37.2848	-13.7864	Undetermined
IL15	31.8245	-8.32607	38.1558	-12.2213	3.89521	0.0672084	-3.89521
IL17A	Undetermined		Undetermined
IL18	30.7824	-7.28395	38.2481	-12.3135	5.0296	0.0306153	-5.0296
CCL3	31.2023	-7.70392	26.1287	-0.194223	-7.5097	182.24	7.5097
CCL19	30.9367	-7.43825	29.8208	-3.88627	-3.55197	11.7287	3.55197
CCL2	22.7487	0.749756	26.5391	-0.604618	1.35437	0.391105	-1.35437
CCL5	29.127	-5.62857	29.3876	-3.45311	-2.17546	4.51728	2.17546
CCR2	38.1025	-14.604	41	-15.0655	0.461443	0.72626	-0.461443
CCR4	30.485	-6.9866	29.8731	-3.93854	-3.04806	8.271	3.04806
CCR5	34.342	-10.8436	33.4415	-7.50695	-3.33666	10.1027	3.33666
CCR7	29.9183	-6.4199	41	-15.0655	8.64558	0.00249701	-8.64558
CXCR3	34.7158	-11.2174	41	-15.0655	3.84811	0.0694391	-3.84811
CXCL10	27.5615	-4.06303	27.4831	-1.54858	-2.51446	5.71383	2.51446
CXCL11	28.5585	-5.06008	28.9314	-2.9969	-2.06318	4.17906	2.06318
CSF1	23.8589	-0.360439	26.5254	-0.590918	0.230478	0.852352	-0.230478
CSF2	30.0068	-6.50833	41	-15.0655	8.55715	0.00265486	-8.55715
CSF3	28.3214	-4.82295	41	-15.0655	10.2425	0.000825454	-10.2425
STAT3	21.2855	2.2129	24.1288	1.80571	0.407194	0.754089	-0.407194
NFKB2	24.0198	-0.521416	27.8401	-1.90553	1.38412	0.383123	-1.38412
IKBKB	24.5902	-1.09174	30.6443	-4.70979	3.61806	0.0814436	-3.61806
CD3E	32.3829	-8.88442	41	-15.0655	6.18106	0.0137822	-6.18106
CD4	28.8688	-5.37039	29.7298	-3.79531	-1.57508	2.97952	1.57508
CD8A	28.8282	-5.32977	26.9171	-0.98262	-4.34715	20.3528	4.34715
CD19	36.3916	-12.8931	41	-15.0655	2.17234	0.221851	-2.17234
IL2RA	34.4441	-10.9456	30.2414	-4.3069	-6.63873	99.6455	6.63873
CD28	34.8563	-11.3579	31.3992	-5.46465	-5.89322	59.4343	5.89322
CD38	32.1913	-8.69287	31.7315	-5.79701	-2.89586	7.4429	2.89586
CD40	26.5602	-3.06179	29.3934	-3.45885	0.39706	0.759404	-0.39706
PTPRC	32.506	-9.00758	29.7959	-3.86134	-5.14624	35.4139	5.14624
CD68	23.9039	-0.405458	24.878	1.05649	-1.46194	2.75479	1.46194
CD80	33.718	-10.2195	41	-15.0655	4.84595	0.0347714	-4.84595
CD86	34.604	-11.1056	32.9116	-6.97707	-4.12856	17.4912	4.12856
CTLA4	34.5636	-11.0652	41	-15.0655	4.0003	0.0624872	-4.0003
CD40LG	39.2306	-15.7322	41	-15.0655	-0.666727	1.58747	0.666727
HLA-DRA	30.3444	-6.84601	32.4292	-6.4947	-0.351305	1.27571	0.351305
HLA-DRB1	Undetermined		Undetermined
TBX21	31.9933	-8.49491	34.0753	-8.14077	-0.354139	1.27822	0.354139
TNFRSF18	30.5589	-7.06049	36.7634	-10.8289	3.76841	0.0733828	-3.76841
ICOS	36.1604	-12.662	41	-15.0655	2.4035	0.189006	-2.4035
NOS2	31.6094	-8.11094	33.9952	-8.06072	-0.0502129	1.03542	0.0502129
BCL2	24.4102	-0.911762	27.86	-1.92549	1.01373	0.495265	-1.01373
BCL2L1	26.4953	-2.99688	30.4687	-4.53422	1.53735	0.344519	-1.53735
BAX	21.558	1.94042	26.7629	-0.828335	2.76875	0.146731	-2.76875
ICAM1	24.2066	-0.708197	30.2758	-4.34124	3.63304	0.080602	-3.63304
SELP	29.1872	-5.68881	41	-15.0655	9.37667	0.00150433	-9.37667
SELE	28.4147	-4.91632	41	-15.0655	10.1492	0.000880637	-10.1492
HMOX1	23.8609	-0.362503	29.6177	-3.68323	3.32072	0.100083	-3.32072
PTGS2	24.462	-0.963619	31.3194	-5.38488	4.42126	0.0466734	-4.42126
LRP2	30.0277	-6.52929	29.9291	-3.99458	-2.53471	5.79461	2.53471
CYP1A2	Undetermined		Undetermined
CYP7A1	33.3289	-9.83045	41	-15.0655	5.23503	0.0265521	-5.23503
IFNG	Undetermined		Undetermined
PRF1	34.5182	-11.0198	41	-15.0655	4.04573	0.06055	-4.04573
GZMB	36.4654	-12.967	35.6728	-9.73829	-3.22866	9.37399	3.22866
GNLY	Undetermined		Undetermined
FAS	24.3977	-0.899284	30.4688	-4.53425	3.63497	0.0804945	-3.63497
FASLG	Undetermined		Undetermined
TGFB1	22.2426	1.25579	26.2132	-0.278687	1.53447	0.345205	-1.53447
SMAD3	23.7058	-0.207365	28.7187	-2.78421	2.57684	0.167607	-2.57684
SMAD7	24.1991	-0.700706	28.9265	-2.99201	2.2913	0.204291	-2.2913
SKI	21.226	2.27244	24.1551	1.77938	0.493053	0.71052	-0.493053
FN1	16.0176	7.48086	23.7831	2.15145	5.32942	0.0248706	-5.32942
C3	21.4075	2.09096	28.3061	-2.37161	4.46257	0.0453558	-4.46257
TNF	29.8502	-6.35181	36.9317	-10.9971	4.64533	0.0399591	-4.64533
LTA	33.9636	-10.4652	36.2938	-10.3592	-0.105955	1.07621	0.105955
ACE	28.2558	-4.75734	31.6845	-5.75002	0.992687	0.502541	-0.992687
VEGFA	23.2745	0.223921	26.7935	-0.858982	1.0829	0.472078	-1.0829
CD34	28.9246	-5.42615	32.3409	-6.4064	0.980249	0.506892	-0.980249
AGTR1	32.4167	-8.91832	41	-15.0655	6.14716	0.0141098	-6.14716
AGTR2	30.0207	-6.52227	33.3626	-7.42812	0.905848	0.533719	-0.905848
EDN1	23.5849	-0.0865192	30.8316	-4.89709	4.81057	0.0356348	-4.81057
LIF	23.3539	0.144543	32.3066	-6.37212	6.51666	0.0109217	-6.51666
LY96	28.8185	-5.3201	33.7301	-7.79562	2.47553	0.179801	-2.47553
MIF	18.354	5.14438	20.2631	5.67145	-0.527065	1.44099	0.527065
NFATC3	23.3101	0.188316	26.4533	-0.518789	0.707106	0.612548	-0.707106
NFATC4	23.7022	-0.203733	29.4334	-3.49893	3.29519	0.10187	-3.29519
PF4	32.7445	-9.2461	41	-15.0655	5.81938	0.0177089	-5.81938
SYK	25.3675	-1.86907	31.1942	-5.25972	3.39065	0.0953482	-3.39065
18S	4.97548		17.0399
GUSB	24.1783		29.6114
HPRT1	23.7564		29.9742
GAPDH	18.9101		24.1774
ABCA1	22.9677	1.2106	30.7553	-1.14388	2.35448	0.195539	-2.35448
ADAM10	21.874	2.30429	28.5407	1.07075	1.23353	0.425275	-1.23353
ADAM17	24.2154	-0.0371342	29.9565	-0.345127	0.307993	0.807765	-0.307993
ADAM9	20.6403	3.53798	25.7665	3.84488	-0.306902	1.23705	0.306902
APBA1	26.6119	-2.43366	28.3226	1.28881	-3.72247	13.2	3.72247
APBA2	27.2472	-3.06896	29.4692	0.14225	-3.21121	9.26127	3.21121
APBA3	26.3837	-2.20545	31.5919	-1.98053	-0.224916	1.16871	0.224916
APBB1	24.9734	-0.795107	28.0804	1.53101	-2.32611	5.01453	2.32611
APBB2	23.635	0.543249	28.9639	0.647518	-0.104269	1.07495	0.104269
APBB3	26.4625	-2.28423	33.3394	-3.72799	1.44375	0.367609	-1.44375
APCS	Undetermined		Undetermined
APH1A	25.0963	-0.918013	28.8792	0.732225	-1.65024	3.13885	1.65024
APH1B	24.7531	-0.57478	28.4144	1.19696	-1.77174	3.41466	1.77174
APLP1	26.1463	-1.96799	29.3032	0.308233	-2.27622	4.84407	2.27622
APLP2	21.7378	2.44048	26.2877	3.32375	-0.883268	1.84455	0.883268
APOE	20.7294	3.4489	26.4501	3.16136	0.287544	0.819295	-0.287544
APP	18.6002	5.57812	21.7918	7.81958	-2.24146	4.72874	2.24146
BACE1	24.2633	-0.0850735	27.9742	1.63718	-1.72226	3.29952	1.72226
BACE2	22.6574	1.52086	25.9368	3.67464	-2.15378	4.44993	2.15378
CAPN1	21.1272	3.05112	27.8131	1.79832	1.2528	0.419633	-1.2528
CASP3	25.4824	-1.30415	30.874	-1.26256	-0.041584	1.02924	0.041584
CASP6	24.9976	-0.819365	30.8159	-1.20446	0.385096	0.765728	-0.385096
CDC2	25.776	-1.59776	31.7964	-2.18502	0.587263	0.665604	-0.587263
CDK5	25.1568	-0.978498	29.1653	0.446068	-1.42457	2.68434	1.42457
CDK5R1	25.5521	-1.37382	26.6436	2.96781	-4.34164	20.2751	4.34164
SLC18A3	30.7405	-6.56219	32.2144	-2.60295	-3.95924	15.5543	3.95924
CSNK1A1	24.1994	-0.0211506	27.7226	1.88883	-1.90998	3.75803	1.90998
CTSB	20.5208	3.65751	25.6761	3.93534	-0.277826	1.21237	0.277826
CTSC	19.2665	4.91178	25.9006	3.71083	1.20095	0.434989	-1.20095
CTSD	20.0051	4.17316	28.5171	1.09433	3.07883	0.118353	-3.07883
CTSG	Undetermined		Undetermined
BPTF	23.5449	0.633354	27.6908	1.92057	-1.28722	2.44057	1.28722
GJB1	29.5426	-5.36434	33.5101	-3.89872	-1.46562	2.76181	1.46562
GLS	23.4669	0.711357	28.2788	1.33264	-0.621279	1.53824	0.621279
GRIN1	27.8445	-3.66627	25.3192	4.29222	-7.95849	248.74	7.95849
GRIN2A	28.4417	-4.26347	28.312	1.29942	-5.56289	47.2713	5.56289
GRIN2B	30.6978	-6.51951	26.804	2.80745	-9.32696	642.235	9.32696
GRIN2D	24.4969	-0.318628	27.5081	2.10329	-2.42192	5.35883	2.42192
GSK3B	23.2682	0.910055	24.3372	5.27421	-4.36416	20.5941	4.36416
HSD17B10	23.4094	0.768827	26.2509	3.36052	-2.59169	6.02804	2.59169
IDE	25.3947	-1.21643	28.2054	1.40601	-2.62244	6.1579	2.62244
IFNG	Undetermined		Undetermined
IL1A	26.8963	-2.718	33.345	-3.73356	1.01556	0.494636	-1.01556
IL1B	26.5738	-2.39552	33.7099	-4.09851	1.70298	0.30715	-1.70298
IL6	29.7417	-5.56345	34.6963	-5.08487	-0.478579	1.39337	0.478579
INS	36.0805	-11.9022	37.0981	-7.48666	-4.41558	21.3413	4.41558
INSR	24.6641	-0.485868	29.8994	-0.288021	-0.197847	1.14699	0.197847
LRP1	20.9662	3.21211	25.8497	3.76169	-0.549582	1.46366	0.549582
LRP2	30.8424	-6.66411	31.533	-1.92162	-4.74249	26.7689	4.74249
LRPAP1	22.7171	1.46114	26.14	3.47141	-2.01027	4.02858	2.01027
MAPK1	24.4049	-0.226597	26.4305	3.18095	-3.40754	10.6114	3.40754
MAPK3	23.6769	0.501383	25.9582	3.65325	-3.15187	8.88804	3.15187
MAPT	24.9244	-0.74608	21.908	7.70339	-8.44947	349.578	8.44947
MME	23.7236	0.454628	30.2898	-0.678404	1.13303	0.455957	-1.13303
NCSTN	23.6169	0.561344	26.6321	2.97934	-2.41799	5.34427	2.41799
PDE8B	25.3862	-1.20796	31.3156	-1.70424	0.496275	0.708935	-0.496275
PSENEN	31.4801	-7.3018	30.9405	-1.32905	-5.97275	62.8025	5.97275
PLD1	24.8027	-0.624454	30.8435	-1.23211	0.607658	0.656261	-0.607658
PPP2CA	22.8748	1.30353	26.4819	3.12947	-1.82594	3.54539	1.82594
PRKACB	25.885	-1.70671	27.7968	1.81465	-3.52136	11.4825	3.52136
PRKCA	27.1967	-3.01841	27.4152	2.19622	-5.21463	37.1331	5.21463
PRKCB	25.9112	-1.73289	25.9504	3.661	-5.39388	42.0455	5.39388
PRKCE	27.441	-3.26268	29.3047	0.306725	-3.56941	11.8713	3.56941
PRKCG	30.8635	-6.68519	28.7926	0.818842	-7.50403	181.526	7.50403
PKN1	22.94	1.23824	24.4372	5.17418	-3.93593	15.305	3.93593
PSEN1	24.9093	-0.731045	27.5276	2.08378	-2.81483	7.03634	2.81483
PSEN2	26.5831	-2.4048	30.8808	-1.26944	-1.13536	2.19674	1.13536
SERPINA3	26.1333	-1.95502	24.6985	4.91293	-6.86794	116.804	6.86794
SNCA	23.5095	0.668762	24.3389	5.27255	-4.60379	24.3152	4.60379
SOAT1	25.5102	-1.33193	29.9	-0.28861	-1.04332	2.06096	1.04332
SOD2	21.755	2.42331	24.1518	5.45963	-3.03633	8.20399	3.03633
CAPNS2	23.1031	1.07513	30.7509	-1.13954	2.21466	0.215437	-2.21466
TNF	30.5478	-6.36955	34.4071	-4.79565	-1.5739	2.97708	1.5739
UCHL1	21.7073	2.471	23.4044	6.207	-3.73599	13.3244	3.73599
VSNL1	27.6492	-3.47095	28.5514	1.05998	-4.53094	23.1179	4.53094
GAL	29.1421	-4.96378	29.5321	0.0793133	-5.04309	32.9702	5.04309
ACHE	24.642	-0.463768	25.9855	3.6259	-4.08966	17.026	4.08966
AGER	27.9587	-3.78046	33.5688	-3.95737	0.176907	0.884598	-0.176907
NAE1	26.6912	-2.51291	29.4706	0.140795	-2.65371	6.29282	2.65371
BCHE	28.9869	-4.80858	33.6005	-3.98912	-0.819454	1.76474	0.819454
CAPNS1	20.3661	3.81216	24.7507	4.8607	-1.04854	2.06843	1.04854
CHRNA7	28.6716	-4.49335	29.6951	-0.0836887	-4.40966	21.254	4.40966
CSNK1D	21.7672	2.41105	23.9679	5.64351	-3.23247	9.39873	3.23247
CYP46A1	35.5137	-11.3354	34.4341	-4.82265	-6.51273	91.3116	6.51273
GAP43	24.7467	-0.568377	24.4462	5.16516	-5.73354	53.2068	5.73354
GRIN2C	27.8154	-3.63711	31.2064	-1.59494	-2.04217	4.11864	2.04217
SLC30A3	33.2617	-9.0834	38.3348	-8.72336	-0.360035	1.28346	0.360035
ST6GAL1	28.6643	-4.48603	29.5249	0.0864773	-4.57251	23.7937	4.57251
UBQLN1	22.7406	1.43768	24.5131	5.09834	-3.66066	12.6464	3.66066
